# Supplementary material for: A Dy6-cluster-basedfcu-MOF with efficient separation of C2H2/C2H4and selective adsorption of benzene
Source: Royal Society of Chemistry journal article supplement (doi:10.1039/d0qi01182g), 2020-11-16
Supplement: d0qi01182g1.pdf [file d0qi01182g1.pdf]

## ***Supporting Information***

### **A Dy<sub>6</sub>-Clusters Based *fcu*-MOF with Efficient Separation of C<sub>2</sub>H<sub>2</sub>/C<sub>2</sub>H<sub>4</sub> and Seelective Adsorption of Benzene**

Yong-Zhi Li,<sup>a</sup> Hai-Hua Wang,<sup>b</sup> Gang-Ding Wang,<sup>a</sup> Lei Hou,<sup>\*a</sup> Yao-Yu Wang<sup>a</sup> and Zhonghua Zhu<sup>c</sup>

<sup>a</sup>Key Laboratory of Synthetic and Natural Functional Molecule of the Ministry of Education, National Demonstration Center for Experimental Chemistry Education (Northwest University), College of Chemistry & Materials Science, Northwest University, Xi'an, 710069, P. R. China.

<sup>b</sup>College of Food Science and Engineering, Northwest A&F University, Yangling, Shaanxi 712100, China.

<sup>c</sup>School of Chemical Engineering, The University of Queensland, Brisbane 4072, Australia.

\*To whom correspondence should be addressed. E-mail: lhou2009@nwu.edu.cn (Lei Hou).

### **Contents**

|                                          |           |
|------------------------------------------|-----------|
| <b>1. IR spectrum, TGA and PXRD</b>      | <b>S2</b> |
| <b>2. Gas adsorption isotherms</b>       | <b>S3</b> |
| <b>3. Pore size distribution</b>         | <b>S3</b> |
| <b>4. Calculation of sorption heat</b>   | <b>S3</b> |
| <b>5. Selectivity prediction</b>         | <b>S4</b> |
| <b>6. Theoretic simulations</b>          | <b>S5</b> |
| <b>7. Table of crystallographic data</b> | <b>S6</b> |

## 1. IR spectrum, TGA and PXRD

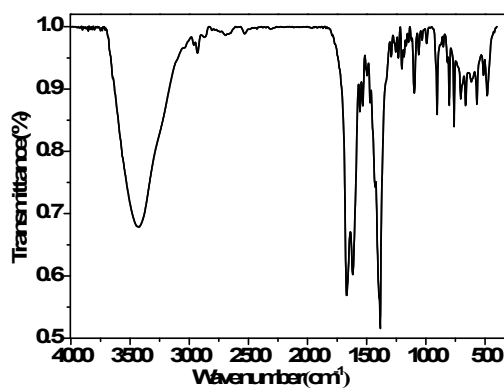

Fig. S1 IR spectrum of as synthesized sample of complex 1.

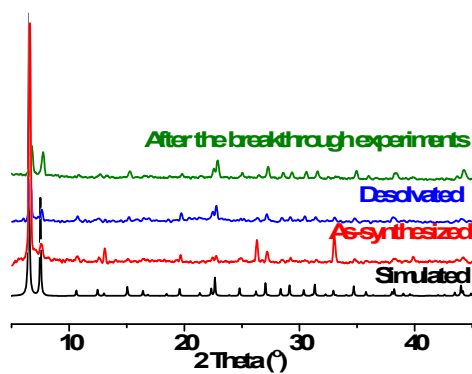

Fig. S2 PXRD patterns of complex 1.

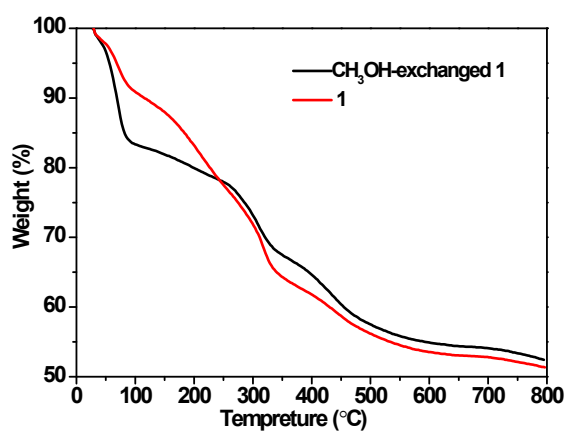

Fig. S3 TGA curves of as-synthesized and CH<sub>3</sub>OH-exchanged samples of complex 1.

## 2. Gas adsorption isotherms

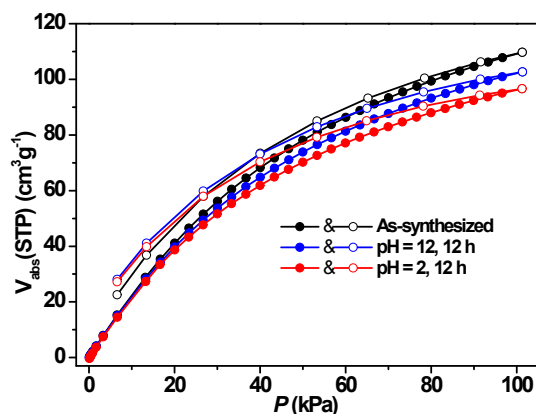

**Fig. S4** Sorption isotherms of **1a** and the treated samples soaked in acidic (pH = 2) and basic (pH = 12) aqueous solutions for 12 hours.

## 3. Pore size distribution

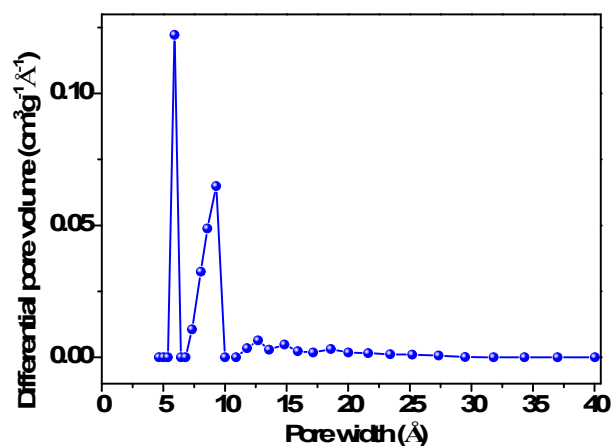

**Fig. S5** Differential pore volume as a function of pore width calculated from the N<sub>2</sub> adsorption isotherm at 77 K for **1a** using the Horvath-Kawazoe model.

## 4. Calculation of sorption heat

$$\ln P = \ln N + 1/T \sum_{i=0}^m a_i N^i + \sum_{i=0}^n b_i N^i \quad Q_{st} = -R \sum_{i=0}^m a_i N^i$$

The above virial expression was used to fit the combined isotherm data for **1a** at 273.15 and 298 K, where  $P$  is the pressure,  $N$  is the adsorbed amount,  $T$  is the temperature,  $a_i$  and  $b_i$

are virial coefficients, and  $m$  and  $N$  are the number of coefficients used to describe the isotherms.  $Q_{st}$  is the coverage-dependent enthalpy of adsorption and  $R$  is the universal gas constant.

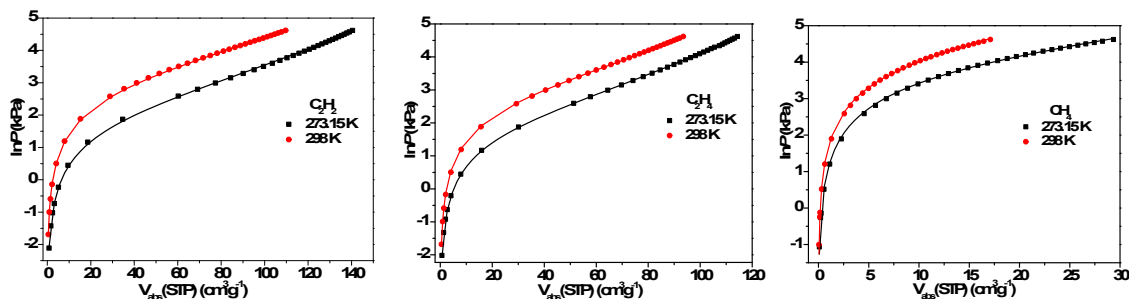

**Fig. S6** Fitted adsorption isotherms of  $C_2H_2$ ,  $C_2H_4$  and  $CH_4$ . Fitting results: for  $C_2H_2$ ,  $a_0 = -3215.24962$ ,  $a_1 = 2.35543$ ,  $a_2 = 0.01674$ ,  $b_0 = 9.88605$ ,  $b_1 = -0.00647$ ,  $b_2 = 0.00057$ ,  $\text{Chi}^2 = 0.00067$ ,  $R^2 = 0.99981$ ; for  $C_2H_4$ ,  $a_0 = -2544.83477$ ,  $a_1 = -0.0516$ ,  $a_2 = 0.03193$ ,  $b_0 = 7.67194$ ,  $\text{Chi}^2 = 0.00025$ ,  $R^2 = 0.99993$ ; for  $CH_4$ ,  $a_0 = -1960.72484$ ,  $a_1 = -1.3773$ ,  $a_2 = 0.08892$ ,  $b_0 = 8.31443$ ,  $\text{Chi}^2 = 0.00237$ ,  $R^2 = 0.99903$ .

## 5. Selectivity prediction

The experimental isotherm data for pure  $C_2$ ,  $CH_4$ ,  $C_6H_6$ ,  $C_7H_8$  and  $C_6H_{12}$  were fitted using a dual Langmuir-Freundlich (L-F) model:

$$q = \frac{a_1 * b_1 * P^{c1}}{1 + b_1 * P^{c1}} + \frac{a_2 * b_2 * P^{c2}}{1 + b_2 * P^{c2}}$$

Where  $q$  and  $p$  are adsorbed amounts and the pressure of component  $i$ , respectively.

The adsorption selectivities for binary mixtures of  $C_2/CH_4$ ,  $C_2H_2/C_2H_4$ ,  $C_6H_6/C_7H_8$  and  $C_6H_6/C_6H_{12}$  defined by

$$S_{i/j} = \frac{x_i * y_j}{x_j * y_i}$$

were respectively calculated using the Ideal Adsorption Solution Theory (IAST). Where  $x_i$  is the mole fraction of component  $i$  in the adsorbed phase and  $y_i$  is the mole fraction of component  $i$  in the bulk.

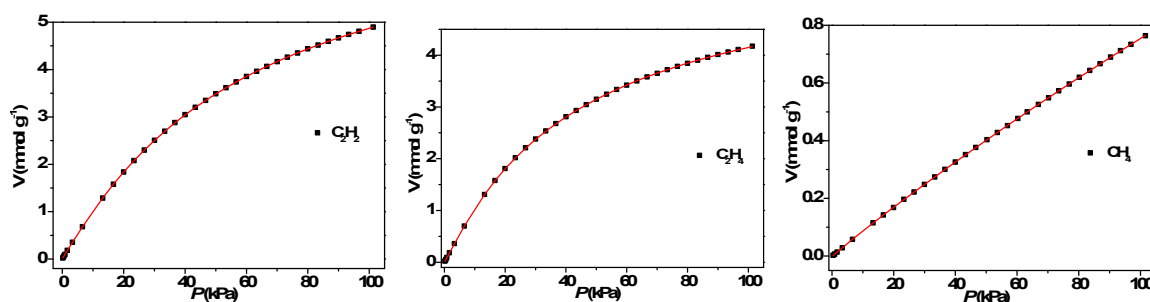

**Fig. S7** Fitted adsorption isotherms of  $C_2H_2$ ,  $C_2H_4$  and  $CH_4$ . Fitting results: for  $C_2H_2$ ,  $a_1 = 6.63211$ ,  $b_1 = 0.01184$ ,  $c_1 = 1.1078$ ,  $a_2 = 2.64638$ ,  $b_2 = 0.01265$ ,  $c_2 = 0.62804$ ,  $\text{Chi}^2 = 4.6442\text{E-}6$ ,  $R^2 = 1$ ; for  $C_2H_4$ ,  $a_1 = 5.82518$ ,  $b_1 = 0.01823$ ,  $c_1 = 1.04157$ ,  $a_2 = 0.14196$ ,  $b_2 = 0.00672$ ,  $c_2 = 1.98292$ ,  $\text{Chi}^2 = 0.00002$ ,  $R^2 = 0.99999$ ; for  $CH_4$ ,  $a_1 = 4.92093$ ,  $b_1 = 0.00132$ ,  $c_1 = 1.06129$ ,  $a_2 = 0.02295$ ,  $b_2 = 0.05033$ ,  $c_2 = 1.45173$ ,  $\text{Chi}^2 = 2.1002\text{E-}7$ ,  $R^2 = 1$ .

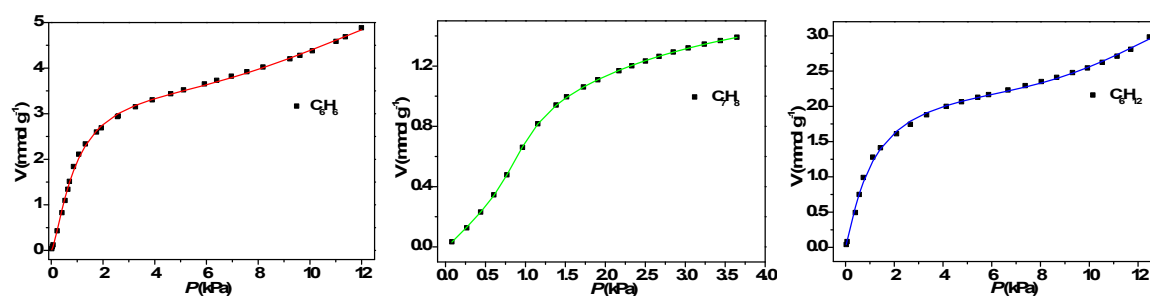

**Fig. S8** Fitted adsorption isotherms of  $C_6H_6$ ,  $C_7H_8$  and  $C_6H_{12}$ . Fitting results: for  $C_6H_6$ ,  $a_1 = 3.68273$ ,  $b_1 = 1.11744$ ,  $c_1 = 1.41879$ ,  $a_2 = 3.49345$ ,  $b_2 = 0.00018$ ,  $c_2 = 3.23897$ ,  $\text{Chi}^2 = 0.00208$ ,  $R^2 = 0.99923$ ; for  $C_7H_8$ ,  $a_1 = 1.48163$ ,  $b_1 = 0.49475$ ,  $c_1 = 1.22674$ ,  $a_2 = 0.34264$ ,  $b_2 = 1.53047$ ,  $c_2 = 5.66832$ ,  $\text{Chi}^2 = 8.3382\text{E-}6$ ,  $R^2 = 0.99997$ ; for  $C_6H_{12}$ ,  $a_1 = 2.44472$ ,  $b_1 = 0.87441$ ,  $c_1 = 1.16341$ ,  $a_2 = 1.72177$ ,  $b_2 = 2.3751\text{E-}6$ ,  $c_2 = 4.9358$ ,  $\text{Chi}^2 = 0.00119$ ,  $R^2 = 0.99868$ .

## 6. Theoretic simulations

Grand canonical Monte Carlo (GCMC) simulations were performed for the gas adsorption in the framework by the Sorption module of Material Studio (Accelrys. Materials Studio Getting Started, release 5.0). The framework was considered to be rigid, and the optimized gas and epoxide molecules were used. The partial charges for atoms of the framework were derived from QEq method and QEq\_neutral 1.0 parameter. One unit cell was used during the simulations. The interaction energies between the gas molecules and framework were

computed through the Coulomb and Lennard-Jones 6-12 (LJ) potentials. All parameters for the atoms were modeled with the universal force field (UFF) embedded in the MS modeling package. A cutoff distance of 12.5 Å was used for LJ interactions, and the Coulombic interactions were calculated by using Ewald summation. For each run, the  $3 \times 10^6$  maximum loading steps,  $3 \times 10^6$  production steps were employed.

The binding energy was calculated by DFT method using the Dmol<sup>3</sup> software. The exchange-correlation functional used in calculations was in the framework of the generalized gradient approximation (GGA) proposed by Perdew and Wang (PBE). DND basis set was used to describe the atomic orbital. The SCF convergence was set to  $10^{-5}$ . The binding energy of is evaluated by the following equation:  $E_{\text{bind}} = E_{\text{framework+gas}} - E_{\text{framework}} - E_{\text{gas}}$ , in which  $E_{\text{framework+gas}}$  is the total energy of the framework and the adsorbed gas molecule,  $E_{\text{framework}}$  and  $E_{\text{CO}_2}$  are the energies of the framework and gas molecule.

## 7. Table of crystallographic data

**Table S1.** Crystallographic data for **1**.

|                                                                                           |                                                                                                |
|-------------------------------------------------------------------------------------------|------------------------------------------------------------------------------------------------|
| Chemical formula                                                                          | C <sub>48</sub> H <sub>38</sub> Dy <sub>6</sub> F <sub>6</sub> N <sub>24</sub> O <sub>26</sub> |
| Formula weight                                                                            | 2456.02                                                                                        |
| <i>T</i> (K)                                                                              | 296(2)                                                                                         |
| Space group                                                                               | Fm-3m                                                                                          |
| <i>a, b, c</i> (Å)                                                                        | 23.625(5), 23.625(5), 23.625(5)                                                                |
| $\alpha, \beta, \gamma$ (°)                                                               | 90, 90, 90                                                                                     |
| <i>V</i> (Å <sup>3</sup> )                                                                | 13186(9)                                                                                       |
| <i>Z</i> , <i>D</i> <sub>calcd.</sub> (g·cm <sup>-3</sup> )                               | 4, 1.237                                                                                       |
| $\mu$ (mm <sup>-1</sup> )                                                                 | 3.416                                                                                          |
| Reflns collected/unique/ <i>R</i> <sub>int</sub>                                          | 17839/710/0.0504                                                                               |
| Goof                                                                                      | 1.152                                                                                          |
| <i>R</i> <sub>1</sub> <sup>a</sup> , <i>wR</i> <sub>2</sub> <sup>b</sup> ( <i>I</i> > 2σ) | <i>R</i> <sub>1</sub> = 0.0494, <i>wR</i> <sub>2</sub> = 0.1297                                |
| <i>R</i> <sub>1</sub> <sup>a</sup> , <i>wR</i> <sub>2</sub> <sup>b</sup> (all data)       | <i>R</i> <sub>1</sub> = 0.0542, <i>wR</i> <sub>2</sub> = 0.1356                                |

$$^a R_1 = \Sigma ||F_o| - |F_c|| / \Sigma |F_o|; ^b wR_2 = [\Sigma w(F_o^2 - F_c^2)^2 / \Sigma w(F_o^2)^2]^{1/2}.$$

**Table S2.** Selected bond lengths [Å] and angles [°] for **1**.

|              |           |                     |          |                   |          |
|--------------|-----------|---------------------|----------|-------------------|----------|
| Dy(1)-O(1)   | 2.336(17) | O(2)#4-Dy(1)-O(2)#5 | 65.0(3)  | O(2)#3-Dy(1)-N(1) | 69.3(4)  |
| Dy(1)-O(1)#1 | 2.336(17) | O(1)#1-Dy(1)-O(2)   | 139.3(3) | O(2)#4-Dy(1)-N(1) | 133.3(3) |

|                     |           |                     |          |                     |          |
|---------------------|-----------|---------------------|----------|---------------------|----------|
| Dy(1)-O(2)#3        | 2.339(3)  | O(1)#2-Dy(1)-O(2)   | 77.2(4)  | O(2)#5-Dy(1)-N(1)   | 69.3(4)  |
| Dy(1)-O(2)#4        | 2.339(3)  | O(1)#3-Dy(1)-O(2)   | 77.2(4)  | O(2)-Dy(1)-N(1)     | 133.3(3) |
| Dy(1)-O(2)#5        | 2.339(3)  | O(1)-Dy(1)-O(2)     | 139.3(3) | O(3)-Dy(1)-N(1)     | 75.2(4)  |
| Dy(1)-O(2)          | 2.339(3)  | O(2)#3-Dy(1)-O(2)   | 65.0(3)  | O(1)#2-Dy(1)-N(1)#1 | 140.8(6) |
| Dy(1)-O(3)          | 2.458(15) | O(2)#4-Dy(1)-O(2)   | 65.0(3)  | O(1)#3-Dy(1)-N(1)#1 | 83.9(2)  |
| Dy(1)-N(1)#1        | 2.58(2)   | O(2)#5-Dy(1)-O(2)   | 98.9(6)  | O(1)-Dy(1)-N(1)#1   | 83.9(2)  |
| Dy(1)-N(1)#2        | 2.58(2)   | O(1)#1-Dy(1)-O(3)   | 65.6(4)  | O(2)#3-Dy(1)-N(1)#1 | 133.3(3) |
| O(1)#1-Dy(1)-O(1)#2 | 131.3(9)  | O(1)#2-Dy(1)-O(3)   | 65.6(4)  | O(2)#4-Dy(1)-N(1)#1 | 69.3(4)  |
| O(1)#1-Dy(1)-O(1)#3 | 80.2(3)   | O(1)#3-Dy(1)-O(3)   | 65.6(4)  | O(2)#5-Dy(1)-N(1)#1 | 69.3(4)  |
| O(1)#2-Dy(1)-O(1)#3 | 80.2(3)   | O(1)-Dy(1)-O(3)     | 65.6(4)  | O(2)-Dy(1)-N(1)#1   | 133.3(3) |
| O(1)#1-Dy(1)-O(1)   | 80.2(3)   | O(2)#3-Dy(1)-O(3)   | 130.6(3) | O(3)-Dy(1)-N(1)#1   | 75.2(4)  |
| O(1)#2-Dy(1)-O(1)   | 80.2(3)   | O(2)#4-Dy(1)-O(3)   | 130.6(3) | N(1)-Dy(1)-N(1)#1   | 86.3(2)  |
| O(1)#3-Dy(1)-O(1)   | 131.3(9)  | O(1)#1-Dy(1)-O(2)#5 | 77.2(4)  | O(1)#1-Dy(1)-N(1)#2 | 140.8(6) |
| O(1)#1-Dy(1)-O(2)#3 | 139.3(3)  | O(1)#2-Dy(1)-O(2)#5 | 139.3(3) | O(1)#3-Dy(1)-N(1)#2 | 83.9(2)  |
| O(1)#2-Dy(1)-O(2)#3 | 77.2(4)   | O(1)#3-Dy(1)-O(2)#5 | 139.3(3) | O(1)-Dy(1)-N(1)#2   | 83.9(2)  |
| O(1)#3-Dy(1)-O(2)#3 | 139.3(3)  | O(1)-Dy(1)-O(2)#5   | 77.2(4)  | O(2)#3-Dy(1)-N(1)#2 | 69.3(4)  |
| O(1)-Dy(1)-O(2)#3   | 77.2(4)   | O(2)#3-Dy(1)-O(2)#5 | 65.0(3)  | O(2)#4-Dy(1)-N(1)#2 | 133.3(3) |
| O(1)#1-Dy(1)-O(2)#4 | 77.2(4)   | O(2)#5-Dy(1)-O(3)   | 130.6(3) | O(2)#5-Dy(1)-N(1)#2 | 133.3(3) |
| O(1)#2-Dy(1)-O(2)#4 | 139.3(3)  | O(2)-Dy(1)-O(3)     | 130.6(3) | O(2)-Dy(1)-N(1)#2   | 69.3(4)  |
| O(1)#3-Dy(1)-O(2)#4 | 77.2(4)   | O(1)#1-Dy(1)-N(1)   | 83.9(2)  | O(3)-Dy(1)-N(1)#2   | 75.2(4)  |
| O(1)-Dy(1)-O(2)#4   | 139.3(3)  | O(1)#2-Dy(1)-N(1)   | 83.9(2)  | N(1)-Dy(1)-N(1)#2   | 86.3(2)  |
| O(2)#3-Dy(1)-O(2)#4 | 98.9(6)   | O(1)#3-Dy(1)-N(1)   | 140.8(6) | N(1)#1-Dy(1)-N(1)#2 | 150.4(9) |

Symmetry codes: #1 x, z+1/2, -y+1/2; #2 x, -z+1/2, -y+1/2; #3 x, y, -z; #4 x, -y+1, z; #5 x, -y+1, -z.
